# Supplementary material for: Correlation of Serum N-Acetylneuraminic Acid with the Risk of Moyamoya Disease
Source: MDPI journal article supplement (doi:10.3390/brainsci13060913), 2023-06-05
Supplement: s1 [file s1]

# Correlation of Serum N-Acetylneuraminic Acid with the Risk of Moyamoya Disease

Chenglong Liu <sup>1,2,3,4,5,†</sup>, Peicong Ge <sup>1,2,3,4,5,†</sup>, Chaofan Zeng <sup>1,2,3,4,5</sup>, Xiaofan Yu <sup>1,2,3,4,5</sup>, Yuanren Zhai <sup>1,2,3,4,5</sup>, Wei Liu <sup>1,2,3,4,5</sup>, Qiheng He <sup>1,2,3,4,5</sup>, Junsheng Li <sup>1,2,3,4,5</sup>, Xingju Liu <sup>1,2,3,4,5</sup>, Jia Wang <sup>1,2,3,4,5</sup>, Xun Ye <sup>1,2,3,4,5</sup>, Qian Zhang <sup>1,2,3,4,5</sup>, Rong Wang <sup>1,2,3,4,5</sup>, Yan Zhang <sup>1,2,3,4,5</sup>, Jizong Zhao <sup>1,2,3,4,5,\*</sup> and Dong Zhang <sup>1,2,3,4,5,6,\*</sup>

- <sup>1</sup> Department of Neurosurgery, Beijing Tiantan Hospital, Capital Medical University, 119 South Fourth Ring West Road, Fengtai District, Beijing 100070, China; 18976866841@163.com (C.L.); gepeicong@163.com (P.G.); zchf723@163.com (C.Z.); xfyumail@gmail.com (X.Y.); 18610638233@163.com (Y.Z.); liuwe980227@163.com (W.L.); heqiheng96@mail.ccmu.edu.cn (Q.H.); lijunsheng723@163.com (J.L.); liuxingju006@163.com (X.L.); wangjia1118@hotmail.com (J.W.); yexun@bjth.org (X.Y.); zhangqianchina@yahoo.com (Q.Z.); ronger090614@126.com (R.W.); yanzhang135@163.com (Y.Z.)
- <sup>2</sup> China National Clinical Research Center for Neurological Diseases, Beijing 100070, China
- <sup>3</sup> Center of Stroke, Beijing Institute for Brain Disorders, Beijing 100070, China
- <sup>4</sup> Beijing Key Laboratory of Translational Medicine for Cerebrovascular Disease, Beijing 100070, China
- <sup>5</sup> Beijing Translational Engineering Center for 3D Printer in Clinical Neuroscience, Beijing 100070, China
- <sup>6</sup> Department of Neurosurgery, Beijing Hospital, Beijing 100730, China
- \* Correspondence: zhaojizong@bjth.org (J.Z.); zhangdong0660@aliyun.com (D.Z.)
- † These authors contributed equally to this work.

**Table S1. Independent risk factors of MMD and its subtypes.**

| Independent factors            | MMD                       |                 | Ischemic MMD              |                 | Hemorrhagic MMD        |                 |
|--------------------------------|---------------------------|-----------------|---------------------------|-----------------|------------------------|-----------------|
|                                | OR (95% CI)               | <i>p</i> -Value | OR (95% CI)               | <i>p</i> -Value | OR (95% CI)            | <i>p</i> -Value |
| Age, y                         | 1.015 (0.994–1.038)       | 0.169           | 1.016 (0.993–1.039)       | 0.184           | 1.014 (0.988–1.040)    | 0.283           |
| Gender                         | 1.004 (0.627–1.607)       | 0.987           | 1.148 (0.705–1.870)       | 0.579           | 0.703 (0.390–1.267)    | 0.241           |
| Heart rate, bpm                | 1.015 (0.982–1.049)       | 0.373           | 1.008 (0.976–1.042)       | 0.617           | 1.025 (0.988–1.063)    | 0.191           |
| SBP, mmHg                      | 1.061 (1.039–1.083)       | <0.001 *        | 1.072 (1.047–1.097)       | <0.001 *        | 1.040 (1.015–1.067)    | 0.002 *         |
| DBP, mmHg                      | 1.044 (1.016–1.072)       | 0.002 *         | 1.052 (1.022–1.084)       | 0.001 *         | 1.027 (0.993–1.062)    | 0.117           |
| BMI, kg/m <sup>2</sup>         | 1.097 (1.030–1.168)       | 0.004 *         | 1.133 (1.059–1.213)       | <0.001 *        | 1.022 (0.947–1.102)    | 0.579           |
| WBC count, 10 <sup>9</sup> /L  | 1.433 (1.222–1.680)       | <0.001 *        | 1.527 (1.284–1.816)       | <0.001 *        | 1.268 (1.073–1.499)    | 0.005 *         |
| LY count, 10 <sup>9</sup> /L   | 1.348 (0.908–2.003)       | 0.139           | 1.791 (1.142–2.810)       | 0.011 *         | 0.869 (0.567–1.332)    | 0.520           |
| NEUT count, 10 <sup>9</sup> /L | 1.534 (1.255–1.876)       | <0.001 *        | 1.621 (1.307–2.010)       | <0.001 *        | 1.340 (1.103–1.628)    | 0.003 *         |
| MONO count, 10 <sup>9</sup> /L | 5.628 (0.816–38.821)      | 0.080           | 8.682 (1.141–66.063)      | 0.037 *         | 2.019 (0.185–22.042)   | 0.564           |
| PLT count, 10 <sup>9</sup> /L  | 1.002 (0.998–1.005)       | 0.376           | 1.002 (0.999–1.006)       | 0.211           | 1.000 (0.995–1.004)    | 0.878           |
| ALT, U/L                       | 1.016 (1.001–1.032)       | 0.036 *         | 1.020 (1.004–1.037)       | 0.015 *         | 1.008 (0.991–1.025)    | 0.362           |
| ALP, U/L                       | 1.032 (1.017–1.047)       | <0.001 *        | 1.031 (1.015–1.046)       | <0.001 *        | 1.036 (1.018–1.055)    | <0.001 *        |
| Glu, mmol/L                    | 1.405 (1.077–1.832)       | 0.012 *         | 1.646 (1.209–2.242)       | 0.002 *         | 0.935 (0.635–1.377)    | 0.733           |
| Urea, mmol/L                   | 0.910 (0.792–1.045)       | 0.183           | 0.895 (0.758–1.056)       | 0.190           | 0.940 (0.830–1.065)    | 0.331           |
| Cr, μmol/L                     | 0.994 (0.978–1.010)       | 0.461           | 0.995 (0.978–1.012)       | 0.568           | 0.992 (0.973–1.011)    | 0.384           |
| TG, mmol/L                     | 1.774 (1.194–2.634)       | 0.005 *         | 1.852 (1.224–2.803)       | 0.004 *         | 1.499 (0.991–2.268)    | 0.055           |
| TC, mmol/L                     | 0.626 (0.488–0.804)       | <0.001 *        | 0.514 (0.388–0.682)       | <0.001 *        | 0.887 (0.633–1.243)    | 0.486           |
| HDL-C, mmol/L                  | 0.080 (0.034–0.188)       | <0.001 *        | 0.059 (0.023–0.149)       | <0.001 *        | 0.141 (0.047–0.424)    | <0.001 *        |
| LDL-C, mmol/L                  | 0.657 (0.495–0.873)       | 0.004 *         | 0.513 (0.373–0.707)       | <0.001 *        | 1.057 (0.725–1.541)    | 0.773           |
| ApoA, g/L                      | 0.177 (0.066–0.473)       | 0.001 *         | 0.162 (0.058–0.457)       | 0.001 *         | 0.142 (0.035–0.578)    | 0.006 *         |
| ApoB, g/L                      | 1.473 (0.504–4.304)       | 0.479           | 0.974 (0.310–3.060)       | 0.964           | 3.945 (1.051–14.811)   | 0.042 *         |
| Hcy, μmol/L                    | 1.075 (1.019–1.134)       | 0.008 *         | 1.073 (1.019–1.131)       | 0.008 *         | 1.056 (0.994–1.122)    | 0.080           |
| PNR                            | 0.982 (0.973–0.991)       | <0.001 *        | 0.980 (0.971–0.990)       | <0.001 *        | 0.985 (0.975–0.996)    | 0.008 *         |
| SII                            | 1.001 (1.000–1.002)       | 0.030 *         | 1.001 (1.000–1.001)       | 0.070           | 1.001 (1.000–1.002)    | 0.017 *         |
| MHR                            | 159.576 (14.011–1817.491) | <0.001 *        | 393.369 (29.479–5249.145) | <0.001 *        | 19.489 (1.203–315.758) | 0.037 *         |
| Neu5Ac, μmol/L                 | 1.395 (1.141–1.706)       | 0.001 *         | 1.299 (1.059–1.593)       | 0.012 *         | 1.666 (1.294–2.144)    | <0.001 *        |

MMD, moyamoya disease; OR, odds ratio; CI, confidence interval; SBP, systolic blood pressure; DBP, diastolic blood pressure; BMI, body mass index; WBC, white blood cell; LY, lymphocyte; NEUT, neutrophil; MONO, monocyte; PLT, platelet; ALT, alanine transaminase; ALP, alkaline phosphatase; Glu, glucose; Cr, creatinine; TG, triglyceride; TC, total cholesterol; HDL-C, high-density lipoprotein cholesterol; LDL-C, low-density lipoprotein cholesterol; ApoA, apolipoprotein A; ApoB, apolipoprotein B; Hcy, homocysteine; PNR, platelet-to-neutrophil ratio; SII, systemic immune-inflammation index; MHR, monocyte-to-HDL cholesterol ratio; Neu5Ac, N-acetylneuraminic acid. \**p* < 0.05, significant difference.

**Table S2. Model collinear statistical analysis of MMD.**

| Variables                     | Continuous Neu5Ac |       | Binary of Neu5Ac |       | Quartiles of Neu5Ac |       |
|-------------------------------|-------------------|-------|------------------|-------|---------------------|-------|
|                               | <i>p</i> -Value   | VIF   | <i>p</i> -Value  | VIF   | <i>p</i> -Value     | VIF   |
| Constant                      | 0.077             |       | 0.065            |       | 0.035*              |       |
| Age, y                        | 0.753             | 1.162 | 0.627            | 1.158 | 0.637               | 1.159 |
| Gender                        | 0.333             | 2.080 | 0.222            | 2.086 | 0.251               | 2.079 |
| SBP, mmHg                     | <0.001 *          | 1.727 | 0.001 *          | 1.725 | 0.001 *             | 1.725 |
| DBP, mmHg                     | 0.707             | 1.592 | 0.775            | 1.590 | 0.759               | 1.590 |
| BMI, kg/m <sup>2</sup>        | 0.962             | 1.239 | 0.971            | 1.240 | 0.918               | 1.241 |
| PLT count, 10 <sup>9</sup> /L | 0.199             | 2.301 | 0.148            | 2.291 | 0.191               | 2.301 |
| ALT, U/L                      | 0.642             | 1.173 | 0.689            | 1.173 | 0.690               | 1.173 |
| ALP, U/L                      | 0.125             | 1.097 | 0.121            | 1.097 | 0.124               | 1.097 |
| Glu, mmol/L                   | 0.911             | 1.156 | 0.885            | 1.156 | 0.982               | 1.156 |
| Urea, mmol/L                  | 0.002 *           | 1.160 | 0.003 *          | 1.158 | 0.002 *             | 1.161 |
| Cr, $\mu$ mol/L               | 0.023 *           | 1.891 | 0.041 *          | 1.879 | 0.025 *             | 1.892 |
| TG, mmol/L                    | 0.021 *           | 1.365 | 0.020 *          | 1.365 | 0.020 *             | 1.365 |
| TC, mmol/L                    | <0.001 *          | 4.065 | <0.001 *         | 4.055 | <0.001 *            | 4.057 |
| ApoB, g/L                     | <0.001 *          | 4.055 | <0.001 *         | 4.035 | <0.001 *            | 4.043 |
| Hcy, $\mu$ mol/L              | 0.014 *           | 1.250 | 0.019 *          | 1.249 | 0.020 *             | 1.248 |
| PNR                           | 0.001 *           | 2.492 | 0.002 *          | 2.492 | 0.002 *             | 2.493 |
| SII                           | 0.850             | 1.810 | 0.779            | 1.808 | 0.815               | 1.808 |
| MHR                           | 0.583             | 1.691 | 0.646            | 1.693 | 0.717               | 1.696 |
| Neu5Ac                        | <0.001 *          | 1.053 | 0.017 *          | 1.039 | 0.001 *             | 1.062 |

MMD, moyamoya disease; Neu5Ac, N-acetylneuraminic acid; VIF, variance inflation factor; SBP, systolic blood pressure; DBP, diastolic blood pressure; BMI, body mass index; PLT, platelet; ALT, alanine transaminase; ALP, alkaline phosphatase; Glu, glucose; Cr, creatinine; TG, triglyceride; TC, total cholesterol; ApoB, apolipoprotein B; Hcy, homocysteine; PNR, platelet-to-neutrophil ratio; SII, systemic immune-inflammation index; MHR, monocyte-to-HDL cholesterol ratio. \**p* < 0.05, significant difference.

**Table S3. Model collinear statistical analysis of ischemic MMD.**

| Variables                     | Continuous Neu5Ac |       | Binary of Neu5Ac |       | Quartiles of Neu5Ac |       |
|-------------------------------|-------------------|-------|------------------|-------|---------------------|-------|
|                               | <i>p</i> -Value   | VIF   | <i>p</i> -Value  | VIF   | <i>p</i> -Value     | VIF   |
| Constant                      | 0.240             |       | 0.153            |       | 0.168               |       |
| Age, y                        | 0.999             | 1.202 | 0.916            | 1.199 | 0.857               | 1.198 |
| Gender                        | 0.916             | 2.409 | 0.760            | 2.420 | 0.820               | 2.407 |
| SBP, mmHg                     | <0.001 *          | 1.759 | 0.001 *          | 1.757 | 0.001 *             | 1.759 |
| DBP, mmHg                     | 0.593             | 1.587 | 0.735            | 1.576 | 0.737               | 1.574 |
| BMI, kg/m <sup>2</sup>        | 0.667             | 1.262 | 0.693            | 1.263 | 0.705               | 1.263 |
| PLT count, 10 <sup>9</sup> /L | 0.056             | 2.612 | 0.045 *          | 2.633 | 0.050               | 2.616 |
| ALT, U/L                      | 0.971             | 1.214 | 0.958            | 1.213 | 0.972               | 1.213 |
| ALP, U/L                      | 0.216             | 1.104 | 0.209            | 1.104 | 0.213               | 1.104 |
| Glu, mmol/L                   | 0.397             | 1.182 | 0.359            | 1.181 | 0.407               | 1.183 |
| Urea, mmol/L                  | 0.004 *           | 1.272 | 0.006 *          | 1.267 | 0.004 *             | 1.270 |
| Cr, $\mu$ mol/L               | 0.014 *           | 2.142 | 0.028 *          | 2.117 | 0.018 *             | 2.133 |
| TG, mmol/L                    | 0.006 *           | 1.330 | 0.007 *          | 1.331 | 0.007 *             | 1.330 |
| TC, mmol/L                    | <0.001 *          | 4.203 | <0.001 *         | 4.206 | <0.001 *            | 4.200 |
| ApoB, g/L                     | <0.001 *          | 4.220 | <0.001 *         | 4.200 | <0.001 *            | 4.213 |
| Hcy, $\mu$ mol/L              | 0.017 *           | 1.262 | 0.025 *          | 1.257 | 0.021 *             | 1.259 |
| PNR                           | 0.004 *           | 2.538 | 0.003 *          | 2.539 | 0.003 *             | 2.534 |
| SII                           | 0.677             | 2.112 | 0.568            | 2.107 | 0.593               | 2.100 |
| MHR                           | 0.610             | 1.805 | 0.578            | 1.808 | 0.584               | 1.804 |
| Neu5Ac                        | 0.007 *           | 1.081 | 0.148            | 1.058 | 0.030 *             | 1.070 |

MMD, moyamoya disease; Neu5Ac, N-acetylneuraminic acid; VIF, variance inflation factor; SBP, systolic blood pressure; DBP, diastolic blood pressure; BMI, body mass index; PLT, platelet; ALT, alanine transaminase; ALP, alkaline phosphatase; Glu, glucose; Cr, creatinine; TG, triglyceride; TC, total cholesterol; ApoB, apolipoprotein B; Hcy, homocysteine; PNR, platelet-to-neutrophil ratio; SII, systemic immune-inflammation index; MHR, monocyte-to-HDL cholesterol ratio. \**p* < 0.05, significant difference.

**Table S4. Model collinear statistical analysis of hemorrhagic MMD.**

| Variables                     | Continuous Neu5Ac |       | Binary of Neu5Ac |       | Quartiles of Neu5Ac |       |
|-------------------------------|-------------------|-------|------------------|-------|---------------------|-------|
|                               | <i>p</i> -Value   | VIF   | <i>p</i> -Value  | VIF   | <i>p</i> -Value     | VIF   |
| Constant                      | 0.793             |       | 0.763            |       | 0.895               |       |
| Age, y                        | 0.384             | 1.292 | 0.342            | 1.291 | 0.422               | 1.295 |
| Gender                        | 0.138             | 1.993 | 0.083            | 1.986 | 0.098               | 1.987 |
| SBP, mmHg                     | 0.010 *           | 1.708 | 0.010 *          | 1.708 | 0.009 *             | 1.708 |
| DBP, mmHg                     | 0.771             | 1.682 | 0.594            | 1.683 | 0.523               | 1.685 |
| BMI, kg/m <sup>2</sup>        | 0.988             | 1.317 | 0.977            | 1.317 | 0.987               | 1.317 |
| PLT count, 10 <sup>9</sup> /L | 0.441             | 2.387 | 0.710            | 2.386 | 0.663               | 2.383 |
| ALT, U/L                      | 0.413             | 1.281 | 0.314            | 1.273 | 0.530               | 1.297 |
| ALP, U/L                      | 0.005 *           | 1.211 | 0.006 *          | 1.210 | 0.005 *             | 1.210 |
| Glu, mmol/L                   | 0.050 *           | 1.311 | 0.086            | 1.314 | 0.056               | 1.311 |
| Urea, mmol/L                  | 0.054             | 1.402 | 0.091            | 1.395 | 0.054               | 1.402 |
| Cr, μmol/L                    | 0.388             | 2.039 | 0.377            | 2.042 | 0.353               | 2.042 |
| TG, mmol/L                    | 0.618             | 1.931 | 0.397            | 1.955 | 0.434               | 1.942 |
| TC, mmol/L                    | 0.001 *           | 3.606 | 0.001 *          | 3.586 | 0.001 *             | 3.591 |
| ApoB, g/L                     | <0.001 *          | 4.169 | 0.001 *          | 4.233 | <0.001 *            | 4.187 |
| Hcy, μmol/L                   | 0.160             | 1.296 | 0.150            | 1.298 | 0.228               | 1.312 |
| PNR                           | 0.102             | 2.603 | 0.159            | 2.600 | 0.127               | 2.600 |
| SII                           | 0.271             | 2.046 | 0.317            | 2.045 | 0.366               | 2.045 |
| MHR                           | 0.406             | 1.723 | 0.641            | 1.696 | 0.671               | 1.691 |
| Neu5Ac                        | <0.001 *          | 1.105 | 0.001 *          | 1.099 | <0.001 *            | 1.104 |

MMD, moyamoya disease; Neu5Ac, N-acetylneuraminic acid; VIF, variance inflation factor; SBP, systolic blood pressure; DBP, diastolic blood pressure; BMI, body mass index; PLT, platelet; ALT, alanine transaminase; ALP, alkaline phosphatase; Glu, glucose; Cr, creatinine; TG, triglyceride; TC, total cholesterol; ApoB, apolipoprotein B; Hcy, homocysteine; PNR, platelet-to-neutrophil ratio; SII, systemic immune-inflammation index; MHR, monocyte-to-HDL cholesterol ratio. \**p* < 0.05, significant difference.

| Table S5. Association between different quartiles of Neu5Ac and the risk of MMD and its subtypes. |                      |                          |          |                          |          |                          |          |
|---------------------------------------------------------------------------------------------------|----------------------|--------------------------|----------|--------------------------|----------|--------------------------|----------|
| Neu5Ac                                                                                            | No. of<br>Events (%) | Crude Model              |          | Model 1                  |          | Model 2                  |          |
|                                                                                                   |                      | OR (95% CI)              | P-Value  | OR (95% CI)              | p-Value  | OR (95% CI)              | p-Value  |
| MMD overall                                                                                       | 360 (80.2)           |                          |          |                          |          |                          |          |
| Quartiles                                                                                         |                      |                          |          |                          |          |                          |          |
| Q1 (<3.82)                                                                                        | 81 (72.3)            | 1.0 (Ref.)               |          | 1.0 (Ref.)               |          | 1.0 (Ref.)               |          |
| Q2 (3.82–<4.52)                                                                                   | 90 (80.3)            | 1.566 (0.839–2.920)      | 0.159    | 1.430 (0.744–2.747)      | 0.283    | 2.038 (0.918–4.525)      | 0.080    |
| Q3 (4.52–<5.59)                                                                                   | 89 (78.7)            | 1.419 (0.770–2.617)      | 0.262    | 1.427 (0.747–2.723)      | 0.281    | 1.878 (0.869–4.059)      | 0.109    |
| Q4 (≥5.59)                                                                                        | 100 (89.2)           | 3.189 (1.540–6.604)      | 0.002 *  | 2.884 (1.350–6.159)      | 0.006 *  | 4.039 (1.650–9.888)      | 0.002 *  |
| <i>p</i> for trend                                                                                |                      | 1.372 (1.108–1.700)      | 0.004 *  | 1.347 (1.075–1.689)      | 0.010 *  | 1.500 (1.143–1.970)      | 0.004 *  |
| Ischemic MMD                                                                                      | 258 (74.3)           |                          |          |                          |          |                          |          |
| Quartiles                                                                                         |                      |                          |          |                          |          |                          |          |
| Q1 (<3.75)                                                                                        | 56 (65.1)            | 1.0 (Ref.)               |          | 1.0 (Ref.)               |          | 1.0 (Ref.)               |          |
| Q2 (3.75–<4.45)                                                                                   | 64 (73.5)            | 1.491 (0.777–2.858)      | 0.229    | 1.453 (0.720–2.931)      | 0.296    | 2.493 (1.018–6.107)      | 0.046 *  |
| Q3 (4.45–<5.37)                                                                                   | 67 (77.0)            | 1.795 (0.920–3.500)      | 0.086    | 1.831 (0.886–3.783)      | 0.102    | 1.917 (0.781–4.705)      | 0.156    |
| Q4 (≥5.37)                                                                                        | 71 (81.6)            | 2.377 (1.180–4.790)      | 0.015 *  | 1.931 (0.914–4.081)      | 0.085    | 3.123 (1.232–7.918)      | 0.016 *  |
| <i>p</i> for trend                                                                                |                      | 1.325 (1.063–1.652)      | 0.012 *  | 1.258 (0.991–1.596)      | 0.060    | 1.395 (1.041–1.868)      | 0.026 *  |
| Hemorrhagic MMD                                                                                   | 102 (53.4)           |                          |          |                          |          |                          |          |
| Quartiles                                                                                         |                      |                          |          |                          |          |                          |          |
| Q1 (<3.76)                                                                                        | 16 (64.0)            | 1.0 (Ref.)               |          | 1.0 (Ref.)               |          | 1.0 (Ref.)               |          |
| Q2 (3.76–<4.68)                                                                                   | 22 (45.8)            | 1.639 (0.716–3.754)      | 0.242    | 1.560 (0.650–3.741)      | 0.320    | 2.454 (0.765–7.880)      | 0.131    |
| Q3 (4.68–<5.66)                                                                                   | 28 (58.3)            | 2.712 (1.180–6.237)      | 0.019 *  | 2.960 (1.220–7.178)      | 0.016 *  | 2.941 (0.998–8.665)      | 0.050    |
| Q4 (≥5.66)                                                                                        | 36 (75.0)            | 5.812 (2.389–<br>14.144) | <0.001 * | 6.598 (2.588–<br>16.819) | <0.001 * | 8.442 (2.703–<br>26.364) | <0.001 * |
| <i>p</i> for trend                                                                                |                      | 1.776 (1.347–2.342)      | <0.001 * | 1.872 (1.396–2.512)      | <0.001 * | 1.917 (1.350–2.722)      | <0.001 * |

Neu5Ac, N-acetylneuraminic acid; MMD, moyamoya disease; OR, odds ratio; CI, confidence interval. \**p* < 0.05, significant difference.
